# Supplementary material for: Tetra-n-butylammonium decatungstate supported on Fe3O4 nanoparticles: a novel nanocatalyst for green synthesis of nitroso compounds
Source: Royal Society of Chemistry journal article supplement (doi:10.1039/d2cy01862d), 2023-01-01
Supplement: d2cy01862d1.pdf [file d2cy01862d1.pdf]

## 1 **Supporting Information**

# 2 **Tetra-n-butylammonium decatungstate supported on** 3 **Fe<sub>3</sub>O<sub>4</sub> nanoparticles: a novel nano-catalyst for green** 4 **synthesis of nitroso compounds**

5

6 *Peng Cheng, Mohamed Sarakha, Christine Mousty, Pierre Bonnet, and Gilles Mailhot\**

7 Université Clermont Auvergne, CNRS, Clermont Auvergne INP, Institut de Chimie de

8 Clermont Ferrand (ICCF) UMR 6296, BP 80026, F-63171, Aubière cedex, France

9 \* Corresponding author. E-mail address: Gilles.Mailhot@uca.fr.

## 10 **The method of magnetite preparation**

11 A mixture of 27.03 g  $\text{FeCl}_3 \cdot 6\text{H}_2\text{O}$  and 19.88 g  $\text{FeCl}_2 \cdot 4\text{H}_2\text{O}$  in 800 mL Milli-Q water was  
12 constantly stirred under a nitrogen atmosphere. The pH was adjusted by NaOH aqueous solution  
13 to 9 - 10 and the solution volume was adjusted to 1.0 L with Milli-Q water. The reaction vessel  
14 was then kept in the dark for 48 h at 60 °C. After centrifugation, the solid was carefully washed  
15 with Milli-Q water until the water conductivity was less than  $2.0 \mu\text{S cm}^{-1}$  and then dried.

16

## 17 UV-Vis spectra of TBADT

18 **Fig. S1** shows that TBADT at low concentration exhibits two characteristic peaks in the  
19 range of 250–350 nm in UV-vis spectra, in agreement with the previous works <sup>1,2</sup>. The peak at  
20 320 nm is ascribed to oxygen to tungsten charge transition (LMCT) of four linear W-O-W  
21 bridge bonds in the  $W_{10}O_{32}^{4-}$  structure <sup>1-3</sup> and the other weak peak at 264 nm likely corresponds  
22 to the LMCT process of the unstable structural subunit  $[W_5O_{16}]^{2-}$  <sup>4</sup>. The molar absorption  
23 coefficient of TBADT ( $W_{10}O_{32}^{4-}$ ) at 320 nm of  $11983 \text{ M}^{-1} \text{ cm}^{-1}$  is in perfect agreement with the  
24 published literature data <sup>5-7</sup>. This can illustrate that TBADT has high purity.

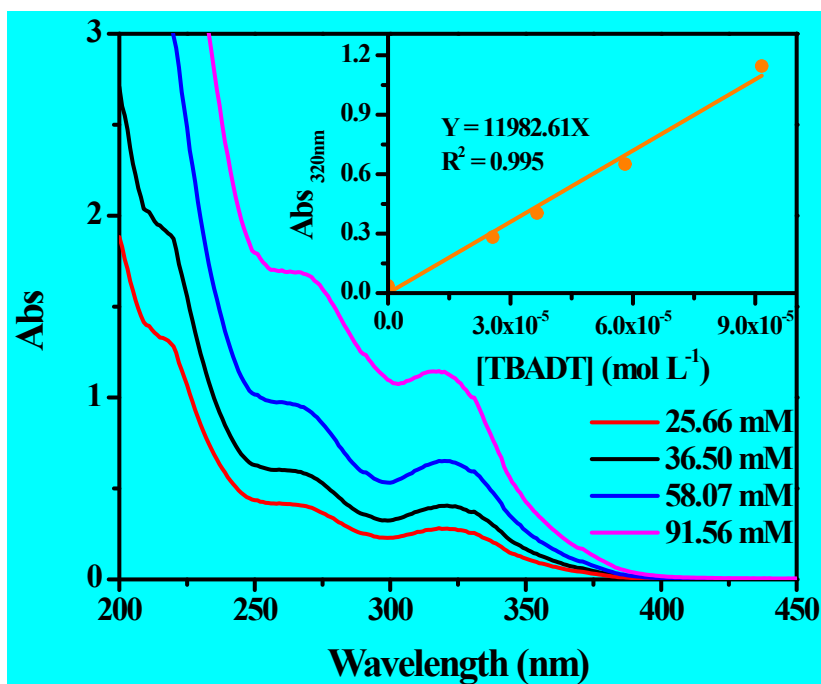

25

26 **Fig. S1.** The UV-vis spectra of different concentrations of TABDT in acetonitrile. Insert

27 shows the calibration curve of the molar absorption coefficient of TBADT

## 28 **The elution conditions of preparative LC, UPLC-Ms, HPLC**

29 For **Preparative LC**. The analyses were performed using an eluent composed of acetonitrile  
30 and water with 0.1 % of trifluoroacetic acid (TFA), in an isocratic mode at 25/75% and a flow  
31 rate of 40 mL min<sup>-1</sup>. N-SPD was finally collected after the evaporation of the solvent. For  
32 **UPLC-Ms**. The elution was performed using the following gradient program: a linear increase  
33 of acetonitrile from 5 to 99 % within 7.5 min followed by 0.5 min at 99 % of acetonitrile, a  
34 decrease of CH<sub>3</sub>CN to 5 % in 0.5 min, and a final step of 5 % within 3 min. The column was a  
35 Kinetex EVO C18 (100 mm x 2.1 mm; particle size: 1.7 μm (Phenomenex)) and the flow rate  
36 was set at 0.45 mL min<sup>-1</sup>. For **HPLC**. The analyses were performed using acetonitrile as a  
37 mobile phase and water with 0.5 % of phosphoric acid at a flow rate of 0.40 mL min<sup>-1</sup>. The  
38 elution was performed using the following gradient: 5 % of CH<sub>3</sub>CN for 2.5 min, linear increase  
39 of CH<sub>3</sub>CN to 40 % in 4.5 min, then increase of CH<sub>3</sub>CN to 95 % in 1.5 min, 95 % of CH<sub>3</sub>CN for  
40 1 min, and decrease of CH<sub>3</sub>CN to 5 % in 0.5 min.

#### 41 FTIR and XPS analysis of M-DT<sub>2-1</sub>

42 Interactions between Fe<sub>3</sub>O<sub>4</sub> and TBADT in M-DT<sub>2-1</sub> were investigated by FTIR. **Fig. S2**  
43 shows the FTIR spectra of TBADT (**curve a**), Fe<sub>3</sub>O<sub>4</sub> (**curve b**), and M-DT<sub>2-1</sub> (**curve c**). The  
44 main vibration bands of TBADT (**curve a**) are observed at 992, 955, 944, and 571 cm<sup>-1</sup>  
45 corresponding to the stretching vibration of the W=O<sub>t</sub> bond (O<sub>t</sub> - terminal oxygen atoms), and  
46 at 886 and 776 cm<sup>-1</sup> are due to the vibrations of W-O<sub>b</sub>-W (O<sub>b</sub> - corner-sharing-oxygen-bridge)  
47 and W-O<sub>c</sub>-W (Oc-edge-sharing oxygen-bridge) [8]. The vibrations at a range of 2800-3000 cm<sup>-1</sup>  
48 are similar to the previous study [8], which is due to e C-H bond stretching. Additionally, three  
49 characteristic vibrations resulting from TBA<sup>+</sup> at 1600 - 1100 cm<sup>-1</sup> are also observed [9]. In  
50 **curve b** corresponding to the FTIR of Fe<sub>3</sub>O<sub>4</sub>, the band at 577 cm<sup>-1</sup> can be assigned to the Fe-O  
51 stretching mode of the tetrahedral and octahedral sites [10]. The Fe-OH wide vibration band is  
52 ranged from 612 - 626 cm<sup>-1</sup> [11]. By comparing the spectrum of the M-DT<sub>2-1</sub> with TBADT, a  
53 red shift (about 19 cm<sup>-1</sup>) can be noted for the W-O<sub>c</sub>-W bond (795 cm<sup>-1</sup>) (**curve c**), which  
54 corresponds more likely to the interaction between TBADT and Fe<sub>3</sub>O<sub>4</sub> at edge sharing oxygen-  
55 bridge. This phenomenon shows that this interaction reduces the energy of TBADT and  
56 becomes more stable.

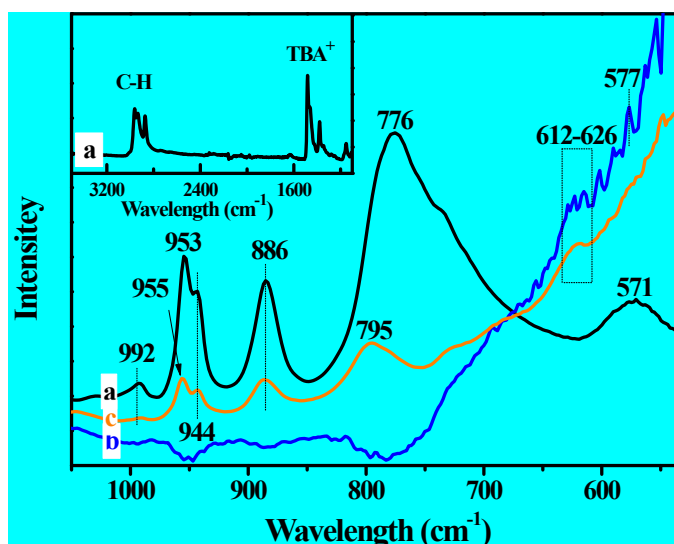

57

58 **Fig. S2** FTIR spectra of TBADT (a), Fe<sub>3</sub>O<sub>4</sub> (b) and M-DT<sub>2-1</sub> (c). Insert shows the FTIR

59

spectrum of TBADT in the range of 1100 - 3500 cm<sup>-1</sup>

60 In order to reconfirm the interactions between Fe<sub>3</sub>O<sub>4</sub> and TBADT and to determine the  
 61 chemical compositions and electronic structure of M-DT<sub>2-1</sub>, XPS spectra of M-DT<sub>2-1</sub> (before  
 62 and after reaction) were compared to that of Fe<sub>3</sub>O<sub>4</sub>.

63 A typical full XPS spectrum of M-DT<sub>2-1</sub> (before reaction) is shown in **Fig. S3(A)**. The  
 64 spectrum indicates the presence of carbon, oxygen, iron, and tungsten, arising from internal  
 65 Fe<sub>3</sub>O<sub>4</sub> and external TBADT. This shows that the M-DT<sub>2-1</sub> has no other contaminants, which is  
 66 consistent with the results of XRD and FTIR. Because the atomic sensitivity factor of Fe is  
 67 much higher than those of C and O, the weaker peak intensity of Fe2p implies that the Fe<sub>3</sub>O<sub>4</sub>  
 68 particles are uniformly and continuously coated by TBADT shells [12].

69 The high-resolution Fe2p spectrum of M-DT<sub>2-1</sub> is shown in **Fig. S3(B)**. Two peaks at 710.16  
 70 and 724.18 eV correspond to Fe2p<sub>3/2</sub> and Fe2p<sub>1/2</sub> components of Fe<sub>3</sub>O<sub>4</sub>, respectively [13]. The  
 71 spin-orbit splitting of Fe2p peaks is broad due to a small chemical shift difference between Fe<sup>2+</sup>  
 72 and Fe<sup>3+</sup> present in Fe<sub>3</sub>O<sub>4</sub> [14]. The Fe2p<sub>3/2</sub> and Fe2p<sub>1/2</sub> spectra were both well fitted ( $\chi^2$ -

73 distribution is less than 6) with two peaks. For the Fe2p<sub>3/2</sub> spectrum, a major peak at 711.25 eV  
74 and a minor one at 709.80 eV can be ascribed to Fe<sup>3+</sup> and Fe<sup>2+</sup>, respectively. In addition, like  
75 the Fe2p<sub>3/2</sub> spectrum, a major peak at 724.50 eV and a minor one at 723.09 eV were observed  
76 in the Fe2p<sub>1/2</sub> spectrum, which can be also ascribed to Fe<sup>3+</sup> and Fe<sup>2+</sup>, respectively. This result  
77 is in agreement with the previous study [15]. The Fe<sup>3+</sup>/Fe<sup>2+</sup> ratio, calculated from the  
78 corresponding area under the spectrum of Fe2p<sub>3/2</sub> and Fe2p<sub>1/2</sub>, is 2:1. This indicates that the  
79 Fe<sub>3</sub>O<sub>4</sub> is of high purity, which is consistent with the XRD result. **Table S1** shows the ratios of  
80 Fe<sup>2+</sup> and Fe<sup>3+</sup> in Fe<sub>3</sub>O<sub>4</sub> and M-DT<sub>2-1</sub> (before and after the reaction) and the fitting peak position  
81 of Fe<sup>2+</sup> and Fe<sup>3+</sup> in Fe 2p<sub>3/2</sub> and Fe2p<sub>1/2</sub> spectra, respectively. It can clearly be observed that the  
82 Fe<sup>3+</sup>/Fe<sup>2+</sup> ratio and peak position in M-DT (before and after reaction) and pure Fe<sub>3</sub>O<sub>4</sub> show no  
83 difference. This illustrates that the chemical composition of Fe<sub>3</sub>O<sub>4</sub> has not significantly changed  
84 after M-DT<sub>2-1</sub> synthesis and after the reaction.

85 In **Fig. S3(C)**, a high-resolution W4f spectrum of M-DT is exhibited. The two peaks of W4f<sub>5/2</sub>  
86 and W4f<sub>7/2</sub> appear at 37.01 and 34.92 eV, respectively [16], which show no difference with  
87 TBADT (**Table S2**).

88 The high-resolution O1s spectrum of M-DT is shown in **Fig. S3(D)**. The O1s spectrum can  
89 be divided into three components centered at 529.25, 530.00, and 531.65 eV. **Table S3** shows  
90 the fitting peak position of O1s in TBADT, Fe<sub>3</sub>O<sub>4</sub>, and M-DT (before and after reaction). The  
91 O1s peak of TBADT appears at 528.98 eV [16] and the O1s peaks of Fe<sub>3</sub>O<sub>4</sub> are concentrated at  
92 530.00 and 531.48 eV which correspond to Fe-O in the Fe<sub>3</sub>O<sub>4</sub> phase [17,18] and the hydroxyl  
93 bonding (Fe-OH) on the surface of Fe<sub>3</sub>O<sub>4</sub> [18]. While in M-DT<sub>2-1</sub>, a small shift at O1s peak of  
94 W-O (increased 0.26-0.27 eV) and Fe-OH (increased 0.16-0.17 eV) can be observed (The data

95 was red bold marked in **Table S3**), comparing the peaks position of M-DT<sub>2-1</sub> with Fe<sub>3</sub>O<sub>4</sub> and  
 96 TBADT. This small shift of W-O could be due to the formation of W-O-Fe interaction. The  
 97 Iron hydroxyl group (Fe-OH) on the surface of Fe<sub>3</sub>O<sub>4</sub> can be affected by this interaction as well,  
 98 subsequently. This result confirms the interaction between M and DT.  
 99 Moreover, the small shift of the O1s spectrum in the M-DT<sub>2-1</sub> can still be observed after the  
 100 reaction, which means this interaction is quite strong.

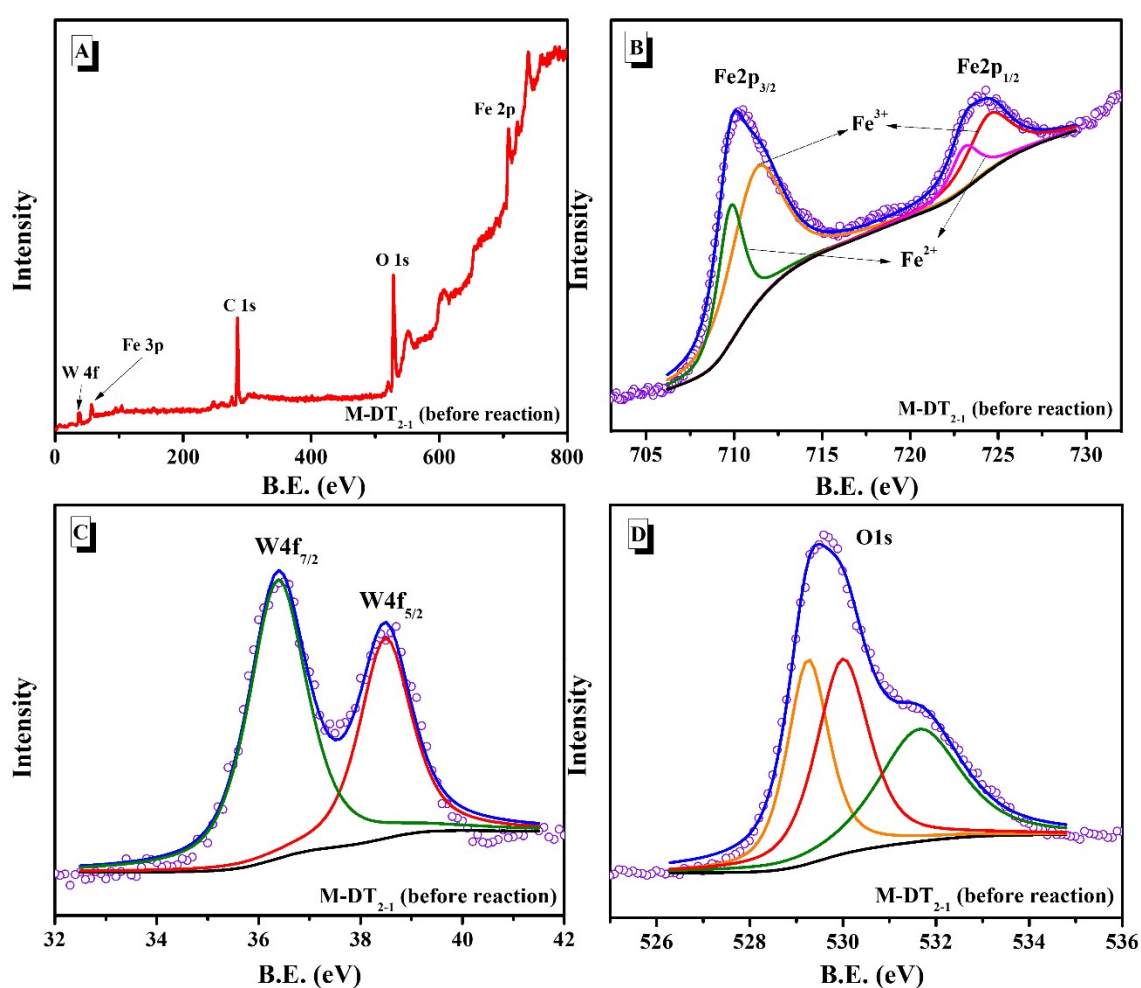

101

102 **Fig. S3. XPS general spectra of M-DT<sub>2-1</sub> (A), and the high-resolution spectra of Fe2p (B),**

103

**W4f (C), and O1s (D)**



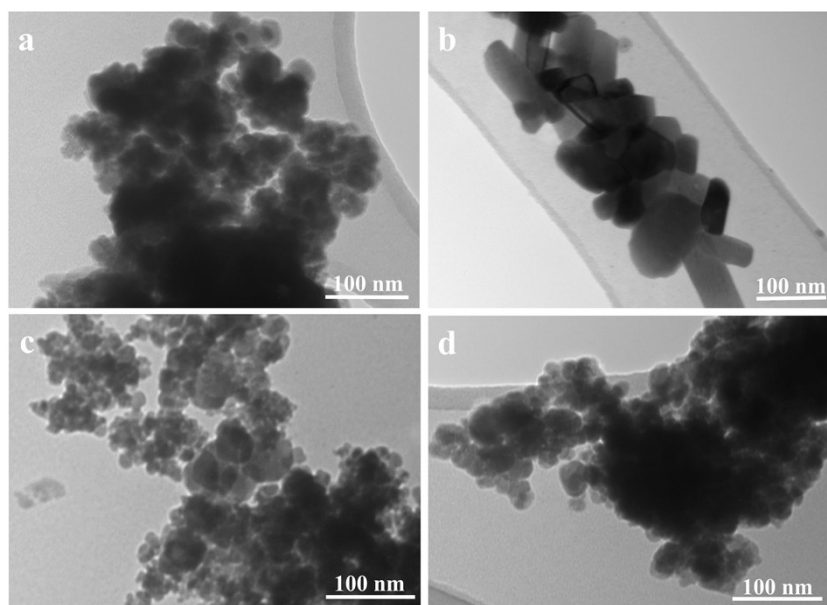

104

105 **Fig. S4.** The TEM images of the Fe<sub>3</sub>O<sub>4</sub> (a), TBADT (b), and the M-DT<sub>2-1</sub> before (c) and after

106

(d) reaction.

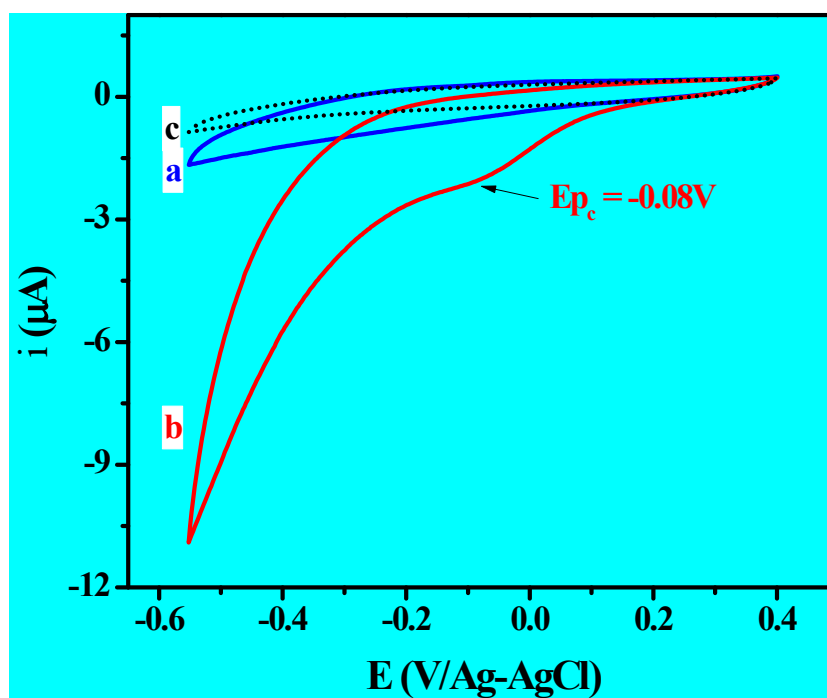

107

108 **Fig. S5.** Cyclic voltammograms of M/PGE in the absence (a) and in presence of 5 mM H<sub>2</sub>O<sub>2</sub>

109

(b) in 0.1 M LiClO<sub>4</sub> (pH = 3.5) under Ar,  $\nu = 10 \text{ mV s}^{-1}$ . The dashed line (curve c)

110

corresponds to the PGE baseline in 0.1 M LiClO<sub>4</sub> pH 3.5 under Ar.

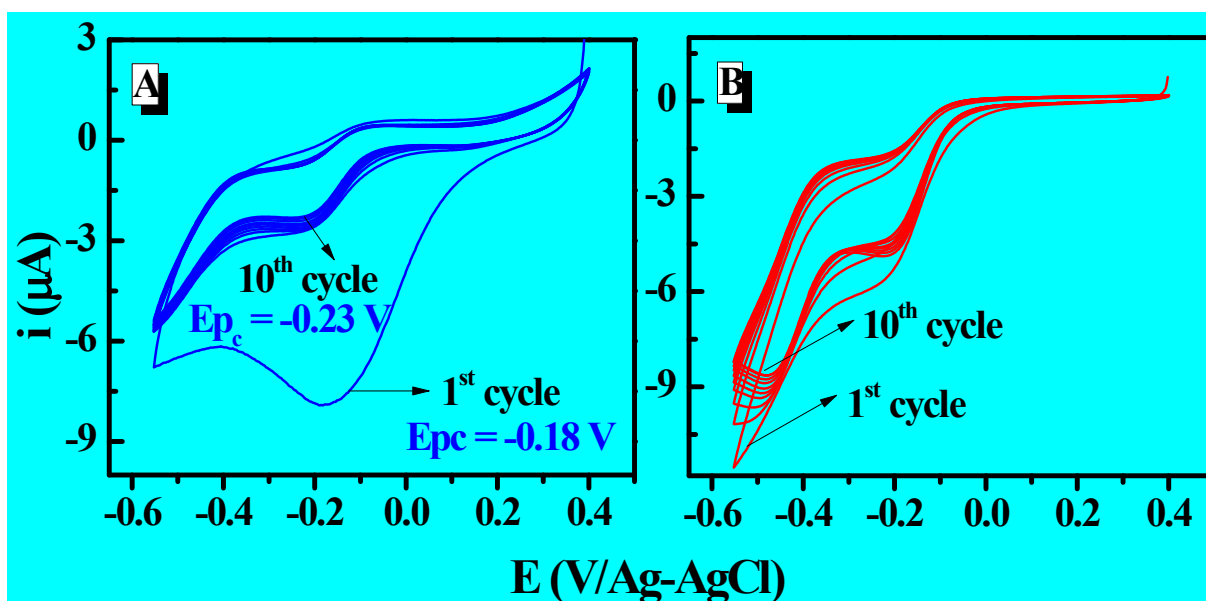

111

112 **Fig. S6.** Ten cycles of CVs of M-DT<sub>2-1</sub>/PGE in the absence (A) and presence of 5 mM H<sub>2</sub>O<sub>2</sub>

113

(B) in 0.1 M LiClO<sub>4</sub> (pH = 3.5) under Ar,  $\nu = 10 \text{ mV s}^{-1}$ .

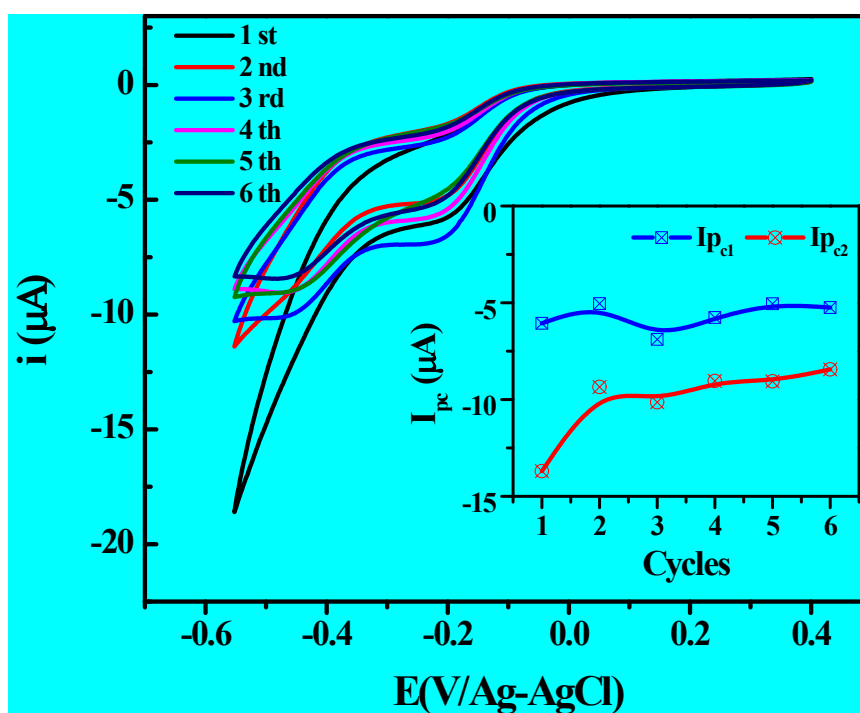

114

115 **Fig. S7.** Six times reuse of M-T<sub>2-1</sub>/PGE in CVs in the presence of 5 mM H<sub>2</sub>O<sub>2</sub> in 0.1 M

116 LiClO<sub>4</sub> (pH = 3.5) under Ar,  $\nu = 10 \text{ mV s}^{-1}$ . Insert shows the cathodic currents  $I_{p_{c1}}$  (⊗) and

117

$I_{p_{c2}}$  (●) at each cycle time.

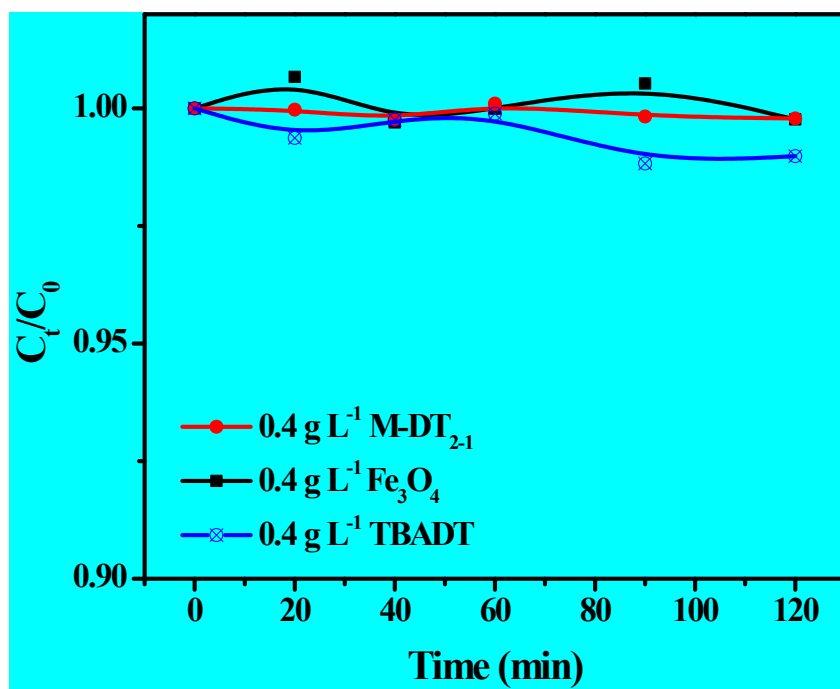

118

119 **Fig. S8.** Adsorption experiments; [SPD] = 30  $\mu\text{M}$ ; pH = 3.0.

120 <sup>1</sup>H NMR (500 MHz, D<sub>2</sub>O): δ 8.22 ppm (d, J = 8.5 Hz, 2H), 8.06 ppm (d, J = 8.6 Hz, 2H),  
121 7.93 ppm (d, J = 6.2 Hz, 1H), 7.90 ppm (d d d, J = 1.9, 7.3, 9.1 Hz, 1H), 7.27 ppm (d, J = 9.0  
122 Hz, 1H), 7.03 ppm (t, J = 6.7 Hz, 1H). The chemical shifts and Spin coupling constants are  
123 consistent with our previous work [to be published] and Castrejon et.al study [19]. After  
124 normalization, the concentration of N-SPD can be obtained according to the NMR peak area.

125

126 The concentration of nitroso-sulfapyridine was calculated as following equation:

$$127 \quad [\text{N - SPD}] = \frac{9A_0 \times [\text{TSPd}_4]}{\mathbf{b} \times \mathbf{A}_{\text{ref}}} \times \mathbf{1.1}$$

128 Where [N-SPD] is the concentration of nitroso-sulfapyridine (N-SPD), A<sub>0</sub> is the area of nitroso-  
129 sulfapyridine resonance in the <sup>1</sup>H NMR spectrum, [TSPd<sub>4</sub>] is the concentration of the reference,  
130 A<sub>ref</sub> is the area of reference resonance in the <sup>1</sup>H NMR spectrum, b is the number of protons of  
131 N-SPD in the signal integrated, and 9 is the number of protons resonating of TSPd<sub>4</sub> at 0 ppm.  
132 The 1.1 factor came from the dilution of TSPd<sub>4</sub>. The average concentration of N-SPD  
133 calculated after quantification by NMR is 52.03 μM (Dropping a sample with a chemical shift  
134 of 7.93 ppm), and the relative standard deviation (RSD) is 4.8% (**Table S3**).

135

136

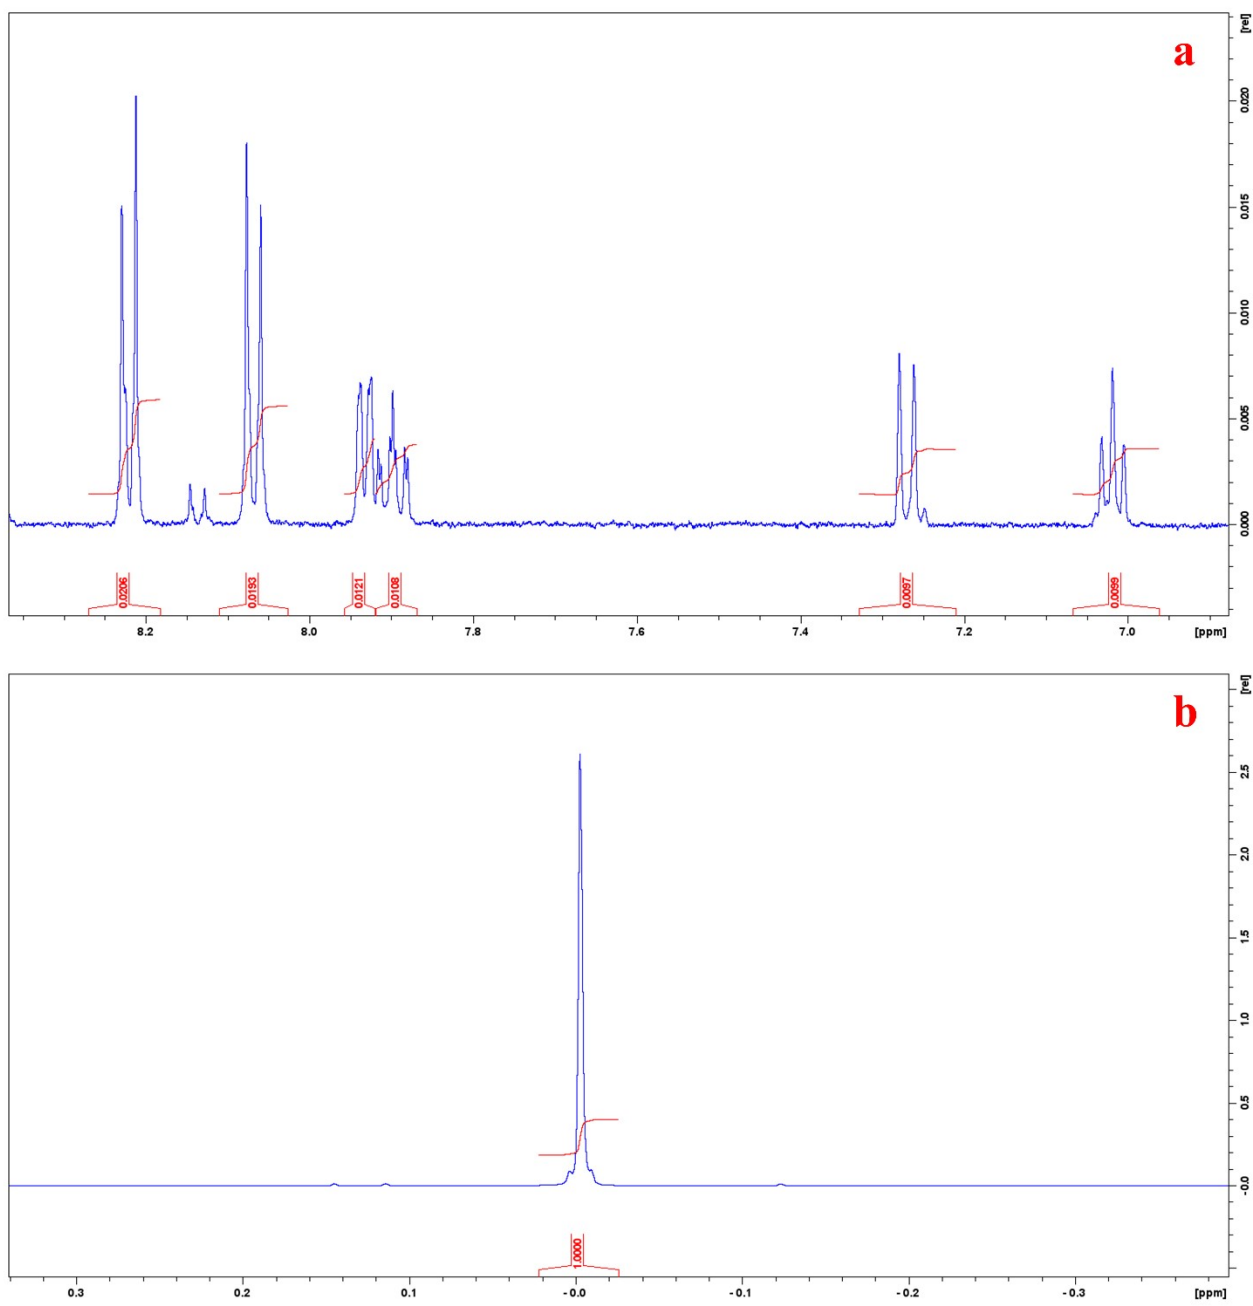

137

138

**Fig. S9.** NMR spectrum of N-SPD (a) and TSPd<sub>4</sub> (b)

## 139 **The Effect of different parameters**

### 140 **a) the ratio between Fe<sub>3</sub>O<sub>4</sub> and TBADT**

141 To study the effect of the different ratios of Fe<sub>3</sub>O<sub>4</sub> and TBADT on **SPD** conversion, we  
142 prepared different M-DT samples at a range of the ratio of Fe<sub>3</sub>O<sub>4</sub> and TBADT from 20/1 to 2/1  
143 (M-DT = 20/1, 10/1, 5/1 and 2/1). In **Fig. S10**, the **SPD** conversion percentage increases from  
144 7.8 to 51.5% with the increase of the percentage of TBADT in M-DT from 4.8% to 33.3%.  
145 Under these conditions, the first-order rate constant increases from  $0.69 \times 10^{-3}$  to  $6.3 \times 10^{-3} \text{ min}^{-1}$   
146 (**Table S6**). Moreover, concerning the yield of nitroso derivative (N-SPD), **Table 3** clearly  
147 shows it remains constant at roughly 78%-86%. Such results are clearly in agreement with the  
148 fact that M-DT presents a good and interesting selectivity for the oxidation of **SPD**.

### 149 **b) Effect of pH**

150 The solution pH is a very important parameter for the selective oxidation of sulfapyridine.  
151 This was studied within the range 1.9 - 7.2 at a constant concentration of M-DT<sub>2-1</sub> (0.2 g L<sup>-1</sup>),  
152 H<sub>2</sub>O<sub>2</sub> (5.0 mM), and **SPD** (30 μM). As observed in **Fig. S11**, the efficiency of SPD conversion  
153 decreases with the increase of the solution pH. Meanwhile, the conversion percentage of SPD  
154 decreases also when the pH increases (**Table S7**). The conversion is estimated to be around  
155 58.9% with a rate constant of  $7.31 \times 10^{-3} \text{ min}^{-1}$  at pH = 1.9 and 36.6% at pH = 4.0 with a rate  
156 constant of  $3.66 \times 10^{-3} \text{ min}^{-1}$ . It drops rapidly to roughly 7.2 % at pH = 7.2 owing more likely to  
157 the lower stability of decatungstate at pH > 5.5, and also due to the interaction between Fe and  
158 W decreasing when pH increases<sup>20</sup>. On the other hand, the protolytic equilibrium of SPD (pKa  
159 = 8.43) may also interfere in the process leading to a change in the solution composition and

160 thus, different reaction processes occurs with the various forms of SPD. Concerning the yield  
161 of N-SPD, it is estimated to be 82.55 % at pH = 2.5 and a small decrease can be observed when  
162 pH = 3.0-4.6 (around 75%). While the yield of N-SPD formation is 0% at pH = 1.9, which is  
163 due to the excessive oxidation of amino compounds to nitro compounds.

#### 164 c) Effect of H<sub>2</sub>O<sub>2</sub> concentration

165 The effect of H<sub>2</sub>O<sub>2</sub> was investigated up to the concentration of 50 Mm (**Fig. S12**). As  
166 observed in **Table S8**, SPD conversion percentage increases up to 36.6% (with a rate constant  
167 of  $3.66 \times 10^{-3} \text{ min}^{-1}$ ) with the increase of H<sub>2</sub>O<sub>2</sub> concentration up to 5.0 mM. The SPD conversion  
168 percentage levels off at roughly 35% within the range of 5-20 Mm with a slight increase of the  
169 rate constant that reaches  $3.82 \times 10^{-3} \text{ min}^{-1}$ . However, for higher concentrations, a decrease of  
170 the yield is observed (roughly 25 %) with a rate constant of about  $2.60 \times 10^{-3} \text{ min}^{-1}$ . Concerning  
171 the selectivity of the reaction, namely nitroso-sulfapyridine formation, its yield increases from  
172 65.5% to 83.7% when H<sub>2</sub>O<sub>2</sub> concentration increases from 1.0 to 20.0 mM. In addition, unlike  
173 the trend of SPD conversion percentage, the yield of N-SPD remains constant at about 85%  
174 when H<sub>2</sub>O<sub>2</sub> concentration increases from 30.0 to 50.0 mM

#### 175 d) Effect of the amount of M-DT<sub>2-1</sub>

176 The effect of the amount of M-DT<sub>2-1</sub> was investigated within the range of **0 – 1.2 g L<sup>-1</sup>** (**Fig.**  
177 **S13**). The SPD conversion percentage increases to reach **94.2%** as the M-DT<sub>2-1</sub> concentration  
178 increases from 0 to **1.2 g L<sup>-1</sup>** (**Table S9**). Under these conditions, the rate constant increases  
179 from  $2.5 \times 10^{-3}$  up to  **$22.9 \times 10^{-3} \text{ min}^{-1}$** . This effect shows an interesting benefit for the oxidation  
180 of SPD. Moreover, an increase of the yield for N-SPD formation is also observed (roughly

181 79.6% for 1.2 g L<sup>-1</sup> of M-DT<sub>2-1</sub>, indicating an important selectivity of the process under these  
182 conditions.

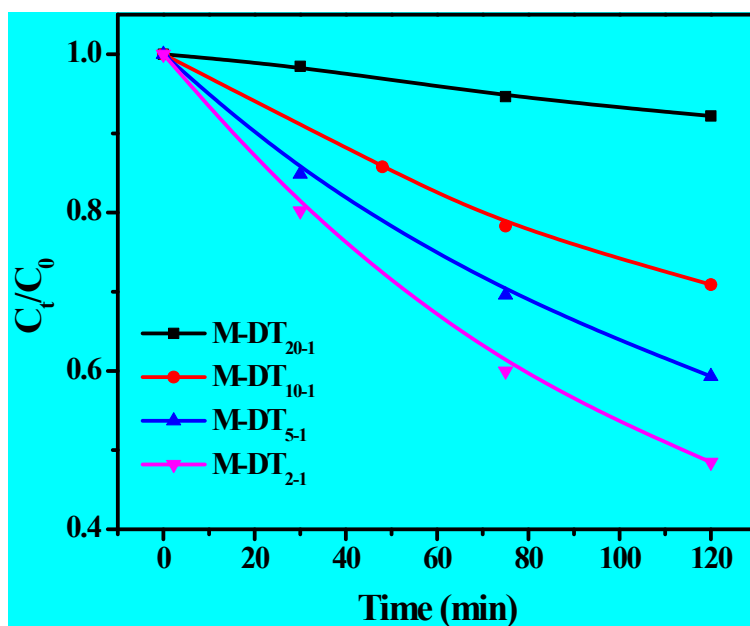

183

184 **Fig. S10.** Effect of the ratio between M and TBADT the conversion of SPD. [M-DT] = 0.2 g

185

L<sup>-1</sup>, [H<sub>2</sub>O<sub>2</sub>] = 5.0 mM; [SPD] = 30 μM; pH = 2.5.

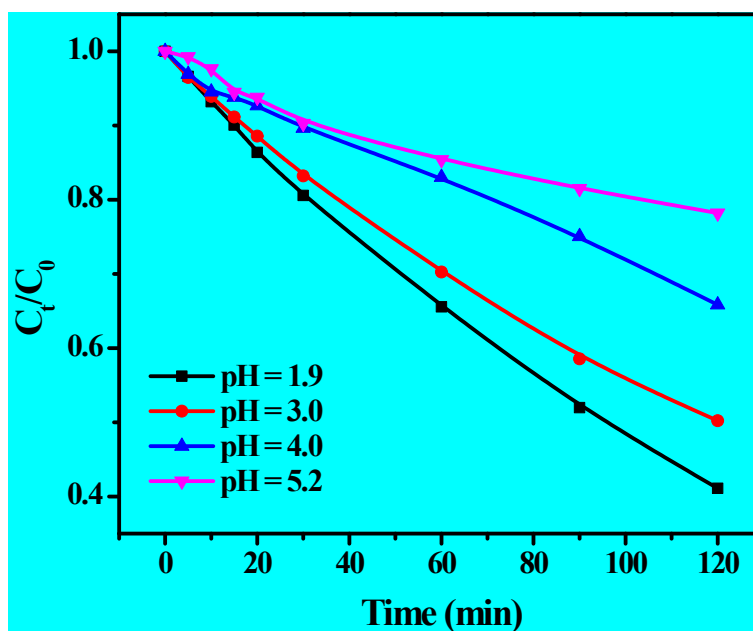

186

187 **Fig. S11.** Effect of pH on the conversion of SPD. [M-DT<sub>2-1</sub>] = 0.2 g L<sup>-1</sup>; [H<sub>2</sub>O<sub>2</sub>] = 5.0 mM;

188

[SPD] = 30 mM



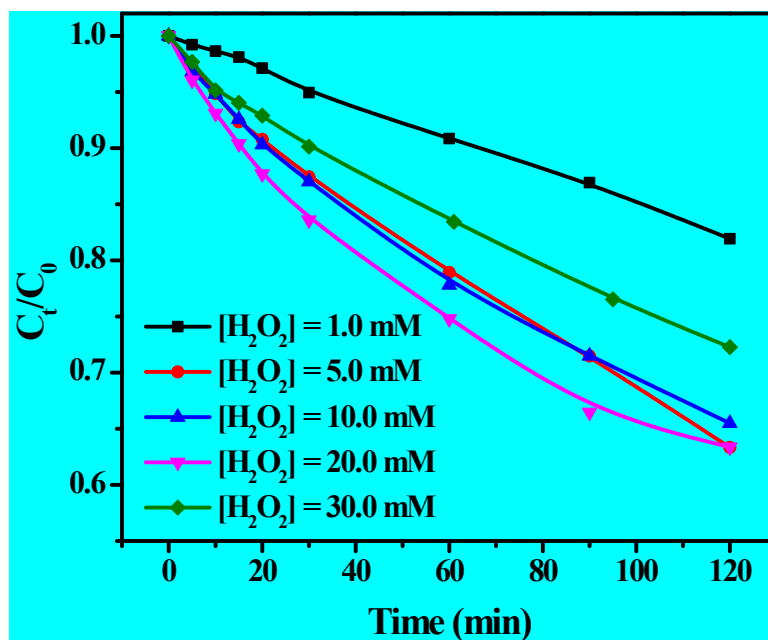

189

190 **Fig. S12.** Effect of H<sub>2</sub>O<sub>2</sub> concentration on the conversion of SPD. [M-DT<sub>2-1</sub>] = 0.2 g L<sup>-1</sup>;

191

[SPD] = 30 μM; pH = 4.0.

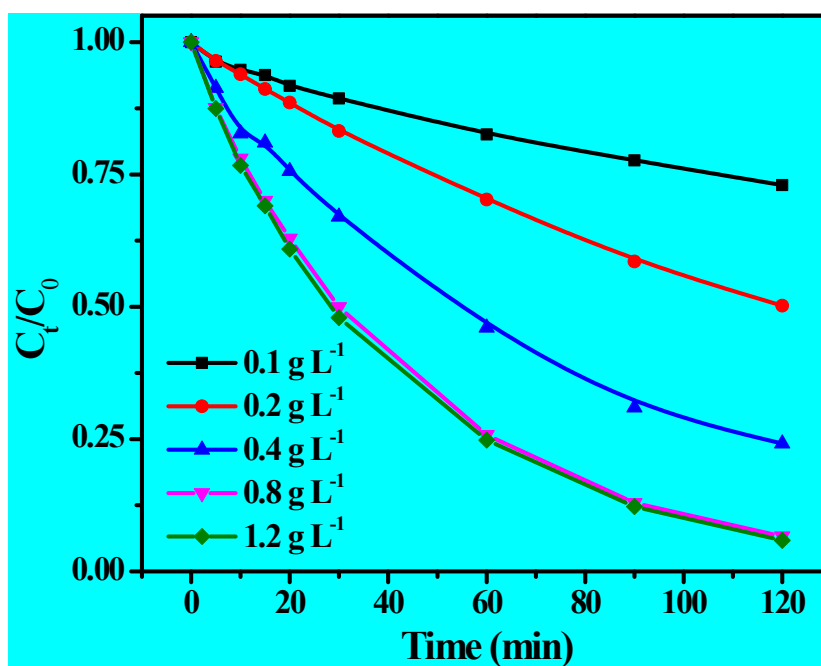

192

193 **Fig. S13.** Effect of the amount of M-T<sub>2-1</sub> on the conversion of SPD. [H<sub>2</sub>O<sub>2</sub>] = 5.0 mM; [SPD]

194

= 30 μM; pH = 3.0.

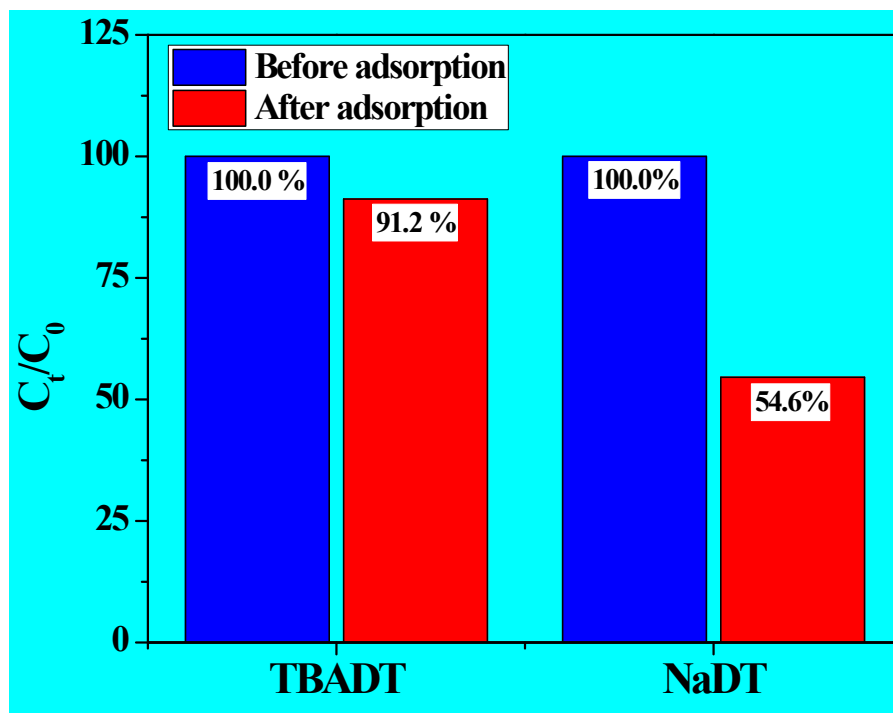

195

196 **Fig. S14.** Adsorption experiment of NaDT and TBADT on magnetite surface. (NaDT and

197 TBADT mixed with magnetite in H<sub>2</sub>O and acetonitrile at pH 3 for 2 and 20 hours

198 respectively.), [Fe<sub>3</sub>O<sub>4</sub>] = 0.26 g L<sup>-1</sup>, NaDT = 2.12 μmol, TBADT = 2.28 μmol.

199

200

201 **Table S1:** The ratios of Fe<sup>2+</sup> and Fe<sup>3+</sup> in Fe<sub>3</sub>O<sub>4</sub> and M-DT<sub>2-1</sub> (before and after reaction) and  
 202 the fitting peak position of Fe<sup>2+</sup> and Fe<sup>3+</sup> in the Fe2p<sub>3/2</sub> and Fe2p<sub>1/2</sub> spectrum, respectively.

| Sample                                | Atomic ratios    |                  |          | Peak position (eV)  |                  |                     |                  |
|---------------------------------------|------------------|------------------|----------|---------------------|------------------|---------------------|------------------|
|                                       |                  |                  |          | Fe2p <sub>1/2</sub> |                  | Fe2p <sub>3/2</sub> |                  |
|                                       | Fe <sup>3+</sup> | Fe <sup>2+</sup> | $\chi^2$ | Fe <sup>3+</sup>    | Fe <sup>2+</sup> | Fe <sup>3+</sup>    | Fe <sup>2+</sup> |
| Fe <sub>3</sub> O <sub>4</sub>        | 0.668            | 0.332            | 3.74     | 724.46              | 723.05           | 711.2<br>9          | 709.83           |
| M-DT <sub>2-1</sub> (before reaction) | 0.667            | 0.333            | 3.18     | 724.50              | 723.09           | 711.2<br>5          | 709.80           |
| M-DT <sub>2-1</sub> (after reaction)  | 0.667            | 0.333            | 5.70     | 724.44              | 723.03           | 711.2<br>5          | 709.79           |

203  $\chi^2$  represents chi-square distribution,  $\chi^2$ -distribution.

204 **Table S2** The fitting peak position of W<sub>4f</sub> in TBADT and M-DT before and after reaction.

| Sample                                | W 4f Peak position (eV) |                     | $\chi^2$ |
|---------------------------------------|-------------------------|---------------------|----------|
|                                       | W 4f <sub>5/2</sub>     | W 4f <sub>7/2</sub> |          |
| TBADT                                 | 37.03                   | 34.92               | 10.96    |
| M-DT <sub>2-1</sub> (before reaction) | 37.01                   | 34.92               | 3.07     |
| M-DT <sub>2-1</sub> (after reaction ) | 36.99                   | 34.92               | 4.78     |

205  $\chi^2$  represent chi-square distribution,  $\chi^2$ -distribution.

206

207

208

209

210 **Table S3** The fitting peak position of O1s in TBADT, Fe<sub>3</sub>O<sub>4</sub> and M-DT<sub>2-1</sub> before and after the  
 211 reaction.

| Sample                                | O1s Peak position (eV) |        |        |
|---------------------------------------|------------------------|--------|--------|
|                                       | W-O                    | Fe-O   | Fe-OH  |
| TBADT                                 | 528.98                 | -      | -      |
| Fe <sub>3</sub> O <sub>4</sub>        | -                      | 530.00 | 531.48 |
| M-DT <sub>2-1</sub> (before reaction) | 529.25                 | 530.00 | 531.65 |
| M-DT <sub>2-1</sub> (after reaction)  | 529.24                 | 530.00 | 531.64 |

212 **Table S4** MS analysis of SPD products and suggested structures

| R-T min | Products | M <sub>measured</sub> m/z | Molecular formula [M+ H] <sup>+</sup>                                        | M <sub>accurate</sub> m/z | Error (ppm) | Chemical structure                                                                    |
|---------|----------|---------------------------|------------------------------------------------------------------------------|---------------------------|-------------|---------------------------------------------------------------------------------------|
| 5.75    | SPD      | 250.0642                  | C <sub>11</sub> H <sub>12</sub> O <sub>2</sub> N <sub>3</sub> S <sup>+</sup> | 250.0656                  | -0.935      | 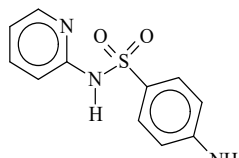 |
| 5.30    | P1       | 266.0591                  | C <sub>11</sub> H <sub>12</sub> O <sub>3</sub> N <sub>3</sub> S <sup>+</sup> | 266.0605                  | -1.159      |  |
| 8.03    | P2       | 280.0384                  | C <sub>11</sub> H <sub>10</sub> O <sub>4</sub> N <sub>3</sub> S <sup>+</sup> | 280.0397                  | -0.832      |  |

8.11 P3  
(N-SPD) 264.0435  $C_{11}H_{10}O_3N_3S^+$  264.0448 -1.054

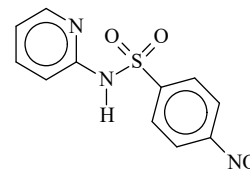

---

213  $[M-DT_{2-1}] = 0.2 \text{ g L}^{-1}$ ;  $[H_2O_2] = 5.0 \text{ mM}$ ;  $[SPD] = 30 \text{ }\mu\text{M}$ ;  $\text{pH} = 4.0$ .

214 **Tab S5** NMR information of N-SPD and TSPD<sub>4</sub>

| Compound                   | TPSD <sub>4</sub> |        |        | N-SPD   |        |        |        |
|----------------------------|-------------------|--------|--------|---------|--------|--------|--------|
|                            | H number          | 9      | 2      | 2       | 1      | 1      | 1      |
| Chemical shift (ppm)       | 0.00              | 8.22   | 8.06   | 7.93    | 7.90   | 7.27   | 7.03   |
| Normalized sum of integral | 1.0000            | 0.0206 | 0.0193 | 0.0121  | 0.0108 | 0.0097 | 0.0099 |
| Concentration (μM)         | 521.90            | 53.22  | 49.86  | 62.52   | 55.80  | 50.12  | 51.15  |
| Average [N-SPD] (μM)       | 52.03             |        |        | RSD (%) |        | 4.8    |        |

215

216 **Table S6** Effect of the ratio between Fe<sub>3</sub>O<sub>4</sub> and TBADT in M-DT on SPD conversion and N-  
217 SPD production within 2h

| M-DT                               | M-DT <sub>20-1</sub>  | M-DT <sub>10-1</sub>  | M-DT <sub>5-1</sub>   | M-DT <sub>2-1</sub>   |
|------------------------------------|-----------------------|-----------------------|-----------------------|-----------------------|
| Rate constant (min <sup>-1</sup> ) | 0.69×10 <sup>-3</sup> | 3.00×10 <sup>-3</sup> | 4.53×10 <sup>-3</sup> | 6.03×10 <sup>-3</sup> |
| Conversion (%)                     | 7.8                   | 29.1                  | 40.7                  | 51.5                  |
| The yield of N-SPD formation (%)   | 78.6                  | 86.3                  | 86.0                  | 82.6                  |

218 [M-DT] = 0.2 g L<sup>-1</sup>; [H<sub>2</sub>O<sub>2</sub>] = 5.0 mM; [SPD] = 30 μM; pH = 2.5

219

220

221

222

223 **Table S7** Effect of pH on SPD conversion and N-SPD production within 2h

| pH                                                  | 1.9  | 2.5  | 3.0  | 4.0  | 4.6  | 5.2  | 7.2  |
|-----------------------------------------------------|------|------|------|------|------|------|------|
| Rate constant ( $\times 10^{-3} \text{ min}^{-1}$ ) | 7.30 | 6.03 | 5.84 | 3.66 | 2.09 | 2.07 | 0.68 |
| Conversion (%)                                      | 58.9 | 51.5 | 49.8 | 36.6 | 21.9 | 21.8 | 7.2  |
| The yield of N-SPD formation (%)                    | 0    | 82.6 | 75.8 | 74.6 | 75.0 | 6.1  | 0    |

224  $[\text{M-DT}_{2-1}] = 0.2 \text{ g L}^{-1}$ ;  $[\text{H}_2\text{O}_2] = 5.0 \text{ mM}$ ;  $[\text{SPD}] = 30 \text{ }\mu\text{M}$

225

226 **Table S8** Effect of  $\text{H}_2\text{O}_2$  concentration on SPD conversion and N-SPD production within 2h

| $[\text{H}_2\text{O}_2]$ (mM)                       | 0 | 1.0  | 5.0  | 10.0 | 20.0 | 30.0 | 40.0 | 50.0 |
|-----------------------------------------------------|---|------|------|------|------|------|------|------|
| Rate constant ( $\times 10^{-3} \text{ min}^{-1}$ ) | 0 | 1.55 | 3.66 | 3.74 | 3.82 | 2.63 | 2.60 | 2.62 |
| Conversion (%)                                      | 0 | 16.4 | 36.6 | 35.3 | 36.6 | 26.7 | 25.6 | 26.6 |
| The yield of N-SPD formation (%)                    | 0 | 65.5 | 74.6 | 74.3 | 83.7 | 85.1 | 85.0 | 84.5 |

227  $[\text{M-DT}_{2-1}] = 0.2 \text{ g L}^{-1}$ ;  $[\text{SPD}] = 30 \text{ }\mu\text{M}$ ; pH = 4.0

228

229 **Table S9** Effect of  $\text{M-DT}_{2-1}$  concentration on SPD conversion and yield of N-SPD within 2h

| $[\text{M-DT}_{2-1}]$ ( $\text{g L}^{-1}$ )         | 0   | 0.1  | 0.2  | 0.4  | 0.8  | 1.2  |
|-----------------------------------------------------|-----|------|------|------|------|------|
| Rate constant ( $\times 10^{-3} \text{ min}^{-1}$ ) | 0   | 2.5  | 5.8  | 12.0 | 22.5 | 22.9 |
| Conversion (%)                                      | 1.5 | 27.0 | 49.8 | 75.8 | 93.4 | 94.2 |
| The yield of N-SPD formation (%)                    | 0   | 66.2 | 66.8 | 73.8 | 78.7 | 79.6 |

230  $[\text{H}_2\text{O}_2] = 5.0 \text{ mM}$ ;  $[\text{SPD}] = 30 \text{ }\mu\text{M}$ ; pH = 3.0

231

232 **Table S10** The comparison of catalytic performance of M-DT<sub>2-1</sub>/H<sub>2</sub>O<sub>2</sub> with previous studies

| Catalyst/H <sub>2</sub> O <sub>2</sub>                                            | substrate   | solvent            | Conversion rate (%) | Selectivity (%) | Ref        |
|-----------------------------------------------------------------------------------|-------------|--------------------|---------------------|-----------------|------------|
| M-DT <sub>2-1</sub>                                                               | SPD         | H <sub>2</sub> O   | 76-94               | 80-85           | This study |
| Molybdenum acetylde oxo-peroxo complex                                            | Aniline     | Different          |                     |                 |            |
|                                                                                   |             | Organic solvent    | 72-97               | 80-97           | 21         |
|                                                                                   |             | Diffrent           |                     |                 |            |
| Au/TiO <sub>2</sub>                                                               | aryl amines | MeOH               | 57-98               | 95              | 22         |
| Au/Al <sub>2</sub> O <sub>3</sub>                                                 | p-toluidine | MeOH               | 16                  | > 95            | 22         |
| Au/ZnO                                                                            | p-toluidine | MeOH               | 37                  | > 95            | 22         |
| Fe <sub>3</sub> O <sub>4</sub> @SiO <sub>2</sub> -Na <sub>2</sub> WO <sub>4</sub> | aniline     | Dimethyl carbonate | -                   | 90              | 23         |

233

234 **References**

- 235 1 F. Bigi, A. Corradini, C. Quarantelli and G. Sartori, *Journal of Catalysis*, 2007, **250**, 222–  
236 230.
- 237 2 A. Su, M. Chen, Z. Fu, B. Yang, J. She, F. Wan, C. Zhang and Y. Liu, *Applied Catalysis A: General*, 2019, **587**, 117261.
- 239 3 S. C. Termes and M. T. Pope, *Inorg. Chem.*, 1978, **17**, 500–501.
- 240 4 K. Nomiya, Y. Sugie, K. Amimoto and M. Miwa, *Polyhedron*, 1987, **6**, 519–524.
- 241 5 D. C. Duncan, T. L. Netzel and C. L. Hill, *Inorg. Chem.*, 1995, **34**, 4640–4646.
- 242 6 P. Cheng, Y. Wang, M. Sarakha and G. Mailhot, *Journal of Photochemistry and Photobiology A: Chemistry*, 2021, **404**, 112890.
- 244 7 D. Dondi, A. M. Cardarelli, M. Fagnoni and A. Albini, *Tetrahedron*, 2006, **62**, 5527–5535.
- 245 8 D. Shi, Z. Ming, Q. Wu, T. Lai, K. Zheng, C. He and J. Zhao, *Inorganic Chemistry Communications*, 2019, **100**, 125–128.
- 247 9 J. Desilvestro and S. Pons, *Journal of Electroanalytical Chemistry and Interfacial Electrochemistry*, 1989, **267**, 207–220.



- 249 10S. Nasrazadani and A. Raman, *Corrosion Science*, 1993, **34**, 1355–1365.
- 250 11M. Stoia, R. Istrate and C. Păcurariu, *J Therm Anal Calorim*, 2016, **125**, 1185–1198.
- 251 12F. Han, L. Ma, Q. Sun, C. Lei and A. Lu, *Nano Research*, 2014, **7**, 1706–1717.
- 252 13T. Radu, C. Iacovita, D. Benea and R. Turcu, *Applied Surface Science*, 2017, **405**, 337–343.
- 253 14S. Tiwari, R. Prakash, R. J. Choudhary and D. M. Phase, *J. Phys. D: Appl. Phys.*, 2007, **40**,
- 254 4943–4947.
- 255 15T. Yamashita and P. Hayes, *Applied Surface Science*, 2008, **254**, 2441–2449.
- 256 16B. Yang, Z. Fu, A. Su, J. She, M. Chen, S. Tang, W. Hu, C. Zhang and Y. Liu, *Applied*
- 257 *Catalysis B: Environmental*, 2019, **242**, 249–257.
- 258 17F. Márquez, G. M. Herrera, T. Campo, M. Cotto, J. Ducongé, J. M. Sanz, E. Elizalde, Ó.
- 259 Perales and C. Morant, *Nanoscale Research Letters*, 2012, **7**, 210.
- 260 18E. Tanasa, C. Zaharia, I.-C. Radu, V.-A. Surdu, B. S. Vasile, C.-M. Damian and E.
- 261 Andronesco, *Nanomaterials*, 2019, **9**, 1384.
- 262 19J. L. Castrejon, S. N. Lavergne, A. El-Sheikh, J. Farrell, J. L. Maggs, S. Sabbani, P. M.
- 263 O’Neill, B. K. Park and D. J. Naisbitt, *Chem. Res. Toxicol.*, 2010, **23**, 184–192.
- 264 20S. Rakshit, B. Sallman, A. Davantés and G. Lefèvre, *Chemosphere*, 2017, **168**, 685–691.
- 265 21A. V. Biradar, T. V. Kotbagi, M. K. Dongare and S. B. Umbarkar, *Tetrahedron Letters*,
- 266 2008, **49**, 3616–3619.
- 267 22S. Fountoulaki, P. L. Gkizis, T. S. Symeonidis, E. Kaminioti, A. Karina, I. Tamiolakis, G.
- 268 S. Armatas and I. N. Lykakis, *Advanced Synthesis & Catalysis*, 2016, **358**, 1500–1508.
- 269 23M. Jadidi Nejad, E. Yazdani, M. Kazemi Miraki and A. Heydari, *Chem. Pap.*, 2019, **73**,
- 270 1575–1583.

271
